# Supplementary material for: A Monte Carlo analysis of the effects of instrumentation errors on aircraft parameter identification
Source: Springer Nature journal article supplement (doi:10.1007/s00262-019-02412-x), 1975-05-01
Supplement: MOESM1 [file 17274426]

**Supplementary Table 1. T-cell phenotype and numbers before and after NACT in primary tumor samples from patients with cervical cancer.**

| Target population                                             | Phenotype                                              | Area         | Cisplatin (n=6) |                | Cisplatin + paclitaxel (n=7) |                 |
|---------------------------------------------------------------|--------------------------------------------------------|--------------|-----------------|----------------|------------------------------|-----------------|
|                                                               |                                                        |              | Pre-NACT        | Post-NACT      | Pre-NACT                     | Post-NACT       |
| T cells                                                       | CD3 <sup>+</sup>                                       | Stromal      | 2365.2 ± 697.8  | 2969.5 ± 895.3 | 3833.3 ± 694.3               | 5189.6 ± 876.2  |
|                                                               |                                                        | Intratumoral | 1092.7 ± 141.7  | 1892.1 ± 501.1 | 1308.0 ± 315.6               | 1310.8 ± 223.4  |
| CD8 <sup>-</sup> T cells                                      | CD3 <sup>+</sup> CD8 <sup>-</sup>                      | Stromal      | 1673.5 ± 657.7  | 2102.2 ± 765.5 | 2660.6 ± 505.4               | 2388.8 ± 568.6  |
|                                                               |                                                        | Intratumoral | 612.4 ± 66.6    | 1111.3 ± 375.8 | 795.7 ± 236.5                | 721.9 ± 158.3   |
| CD8 <sup>+</sup> T cells                                      | CD3 <sup>+</sup> CD8 <sup>+</sup>                      | Stromal      | 192.6 ± 38.0    | 449.6 ± 119.8  | 509.0 ± 134.5                | 2166.3 ± 544.1* |
|                                                               |                                                        | Intratumoral | 358.3 ± 173.8   | 526.3 ± 193.1  | 330.0 ± 81.6                 | 453.6 ± 145.6   |
| Tregs <sup>#</sup>                                            | CD3 <sup>+</sup> CD8 <sup>-</sup> FoxP3 <sup>+</sup>   | Stromal      | 461.3 ± 173.1   | 361.4 ± 52.5   | 566.5 ± 108.4                | 488.2 ± 198.0   |
|                                                               |                                                        | Intratumoral | 105.7 ± 24.7    | 238.3 ± 58.0   | 166.1 ± 74.0                 | 123.0 ± 65.4    |
| CD8 <sup>+</sup> T cell/Treg ratio                            |                                                        | Stromal      | 1.0 ± 0.6       | 1.2 ± 0.2      | 1.2 ± 0.4                    | 16.8 ± 8.4      |
|                                                               |                                                        | Intratumoral | 4.8 ± 2.7       | 3.5 ± 1.5      | 8.4 ± 4.3                    | 29.3 ± 24.7     |
| FoxP3 <sup>+</sup> CD8 <sup>+</sup> T cells                   | CD3 <sup>+</sup> CD8 <sup>+</sup> FoxP3 <sup>+</sup>   | Stromal      | 37.7 ± 27.3     | 56.2 ± 24.9    | 41.9 ± 16.2                  | 177.2 ± 55.1*   |
|                                                               |                                                        | Intratumoral | 16.3 ± 11.6     | 16.3 ± 7.9     | 16.3 ± 7.5                   | 12.3 ± 4.1      |
| Proliferating CD8 <sup>-</sup> T cells                        | CD3 <sup>+</sup> CD8 <sup>-</sup> Ki67 <sup>+</sup>    | Stromal      | 360.4 ± 144.3   | 239.8 ± 121.9  | 624.2 ± 131.2                | 240.2 ± 95.5*   |
|                                                               |                                                        | Intratumoral | 302.9 ± 67.8    | 464.1 ± 233.4  | 403.7 ± 99.4                 | 107.7 ± 28.4    |
| Proliferating CD8 <sup>+</sup> T cells                        | CD3 <sup>+</sup> CD8 <sup>+</sup> Ki67 <sup>+</sup>    | Stromal      | 106.0 ± 57.8    | 85.5 ± 37.4    | 143.2 ± 36.7                 | 168.7 ± 53.0    |
|                                                               |                                                        | Intratumoral | 299.1 ± 171.3   | 261.7 ± 138.4  | 252.9 ± 67.2                 | 60.4 ± 23.1     |
| Proliferating cells                                           | Ki67 <sup>+</sup> (CD3 <sup>+</sup> CD8 <sup>-</sup> ) | Stromal      | 1065.8 ± 241.8  | 599.1 ± 252.7  | 2201.6 ± 446.8               | 451.3 ± 199.2*  |
|                                                               |                                                        | Intratumoral | 4534.0 ± 1159.0 | 4456.5 ± 959.5 | 7052.2 ± 996.6               | 1795.3 ± 1168.9 |
| Proliferating Tregs                                           | CD8 <sup>-</sup> FoxP3 <sup>+</sup> Ki67 <sup>+</sup>  | Stromal      | 90.7 ± 29.7     | 51.7 ± 13.3    | 184.7 ± 39.3                 | 83.6 ± 35.0*    |
|                                                               |                                                        | Intratumoral | 52.5 ± 12.2     | 100.7 ± 26.2   | 83.9 ± 33.8                  | 34.1 ± 15.2     |
| Proliferating FoxP3 <sup>+</sup> CD8 <sup>+</sup> T cells     | CD8 <sup>+</sup> FoxP3 <sup>+</sup> Ki67 <sup>+</sup>  | Stromal      | 23.0 ± 21.5     | 8.5 ± 4.1      | 13.6 ± 6.3                   | 31.2 ± 10.1     |
|                                                               |                                                        | Intratumoral | 9.1 ± 5.9       | 7.6 ± 4.0      | 10.1 ± 4.5                   | 2.1 ± 0.7       |
| Tbet <sup>+</sup> CD8 <sup>-</sup> T cells                    | CD3 <sup>+</sup> CD8 <sup>-</sup> Tbet <sup>+</sup>    | Stromal      | 549.7 ± 136.4   | 606.5 ± 131.5  | 1072.2 ± 272.6               | 583.7 ± 113.4   |
|                                                               |                                                        | Intratumoral | 205.4 ± 47.5    | 333.5 ± 76.5   | 278.6 ± 92.1                 | 178.1 ± 48.1    |
| Tbet <sup>+</sup> CD8 <sup>+</sup> T cells                    | CD3 <sup>+</sup> CD8 <sup>+</sup> Tbet <sup>+</sup>    | Stromal      | 124.6 ± 33.7    | 231.9 ± 62.3   | 297.1 ± 98.9                 | 1246.2 ± 474.7* |
|                                                               |                                                        | Intratumoral | 101.0 ± 25.5    | 151.0 ± 52.9   | 165.4 ± 38.9                 | 222.9 ± 94.0    |
| Tbet <sup>+</sup> cells                                       | Tbet <sup>+</sup> (CD3 <sup>+</sup> CD8 <sup>-</sup> ) | Stromal      | 230.1 ± 66.1    | 317.1 ± 65.2   | 621.9 ± 228.7                | 325.4 ± 93.1*   |
|                                                               |                                                        | Intratumoral | 193.5 ± 64.1    | 429.7 ± 190.6  | 159.7 ± 19.9                 | 212.6 ± 74.5    |
| Tbet <sup>+</sup> Tregs                                       | CD8 <sup>-</sup> FoxP3 <sup>+</sup> Tbet <sup>+</sup>  | Stromal      | 223.8 ± 78.8    | 152.3 ± 20.6   | 299.6 ± 98.2                 | 116.2 ± 37.7    |
|                                                               |                                                        | Intratumoral | 56.0 ± 17.9     | 105.2 ± 26.1   | 74.9 ± 32.1                  | 46.1 ± 24.2     |
| FoxP3 <sup>+</sup> Tbet <sup>+</sup> CD8 <sup>+</sup> T cells | CD8 <sup>+</sup> FoxP3 <sup>+</sup> Tbet <sup>+</sup>  | Stromal      | 26.1 ± 19.2     | 38.8 ± 20.1    | 25.0 ± 8.3                   | 99.6 ± 22.7*    |
|                                                               |                                                        | Intratumoral | 10.3 ± 7.4      | 9.0 ± 5.2      | 11.2 ± 5.3                   | 7.0 ± 2.1       |
| Proliferating Tbet <sup>+</sup> CD8 <sup>+</sup> T cells      | CD8 <sup>+</sup> Ki67 <sup>+</sup> Tbet <sup>+</sup>   | Stromal      | 61.7 ± 36.5     | 38.8 ± 9.5     | 58.7 ± 11.9                  | 82.3 ± 25.5     |
|                                                               |                                                        | Intratumoral | 61.4 ± 19.2     | 85.5 ± 42.9    | 112.8 ± 24.7                 | 18.3 ± 3.0      |

Data are presented as the mean number of cells/mm<sup>2</sup> ± standard error of the mean; <sup>#</sup>Tregs: regulatory T cells; \*P = 0.01- 0.05 as calculated by the Wilcoxon signed rank (paired) test.
